# Supplementary material
Source: ML conference proceedings conference paper supplement (https://proceedings.neurips.cc/paper_files/paper/2019/hash/cfcce0621b49c983991ead4c3d4d3b6b-Abstract.html)
Supplement: Supplementary file 1 [file cfcce0621b49c983991ead4c3d4d3b6b-Supplemental.zip]

Archive with 1 entries (1 files):
- supplementary.pdf
